# Supplementary material
Source: PubMed Central journal article supplement (PMC2555938)

**E08-02-0173 Chen**

**Supplemental Figure 1. Characterization of the *eaf7/eaf7* mutant.** (A) Western analyses of histone H4 acetylation levels in wild-type strain SC5314 and *eaf7/eaf7* strain (CSC1), grown in YPD at 25°C, using antibodies that specifically recognize acetylated H4 (H4Ac; Upstate), H4 acetylated at lysine residues 5 (H4K5Ac; Abcam), 16 (H4K16Ac; Upstate), and histone H4 (H4; Abcam). Cell morphology of *eaf7/eaf7* strain in comparison to wild type (CAI4) in YPD medium at 25°C (B) or in YPD+Serum medium at 37°C (C). (D) ChIP of Epl1-myc in wild-type (CAI4) or *eaf7/eaf7* (CSC1). Cells were grown at 25°C in YPD for yeast growth and at 37°C in YPD + 10% serum for hyphal growth. PCR reactions with primers at -1381 to -1101 of *HWPI*, -424 to -290 of *ALS3*, -1350 to -1103 of *ECE1*, and -301 to +12 of *ACT1* are shown.

**A**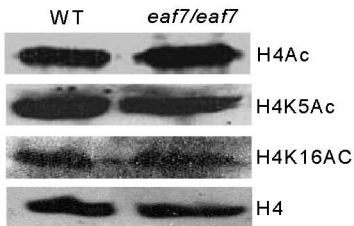**B**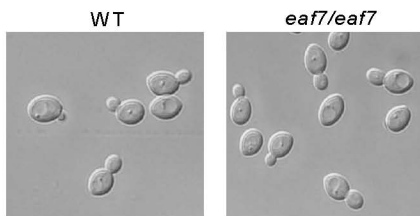

YPD 25°C

**C**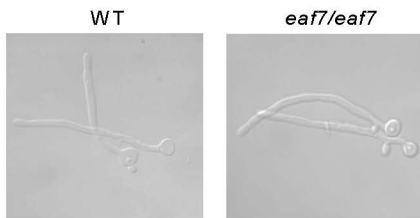

YPD+Serum 37°C

**D**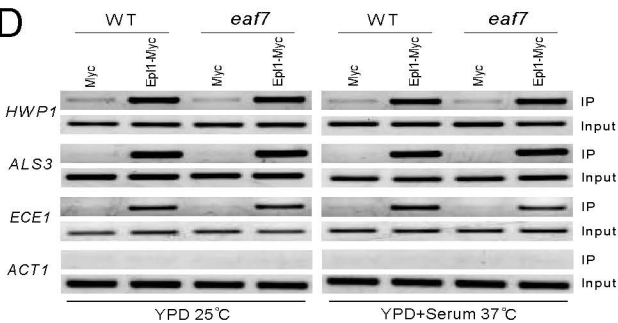

Supplement: E08-02-0173_1.pdf [file E08-02-0173_1.pdf]
